# Supplementary material for: A 3D printed microfluidic device for production of functionalized hydrogel microcapsules for culture and differentiation of human Neuronal Stem Cells (hNSC)
Source: Royal Society of Chemistry journal article supplement (doi:10.1039/c6lc00133e), 2016-01-01
Supplement: c6lc00133e4.pdf [file c6lc00133e4.pdf]

ESI movie captions:

Supplementary movie 1: 3D rendering of the Matrigel layer of a quarter of a capsule, based on 3D confocal imaging of a single capsule made with 25% of Matrigel as volume fractions in the core.

Supplementary movie 2: 13-day time-lapse phase contrast imaging of neuronal differentiation starting one hour post encapsulation of hNSCs within a capsule formed with 25% of Matrigel as volume fractions in the core.
